# Supplementary material
Source: publisher figshare collection journal article supplement (https://rs.figshare.com/ndownloader/files/14083880)
Supplement: Supplementary file [file 14083880]

## **Maiden voyage into death: are fisheries affecting seabird juvenile survival during the first days at sea?**

Isabel Afán, Joan Navarro, David Grémillet, Marta Coll, and Manuela G. Forero

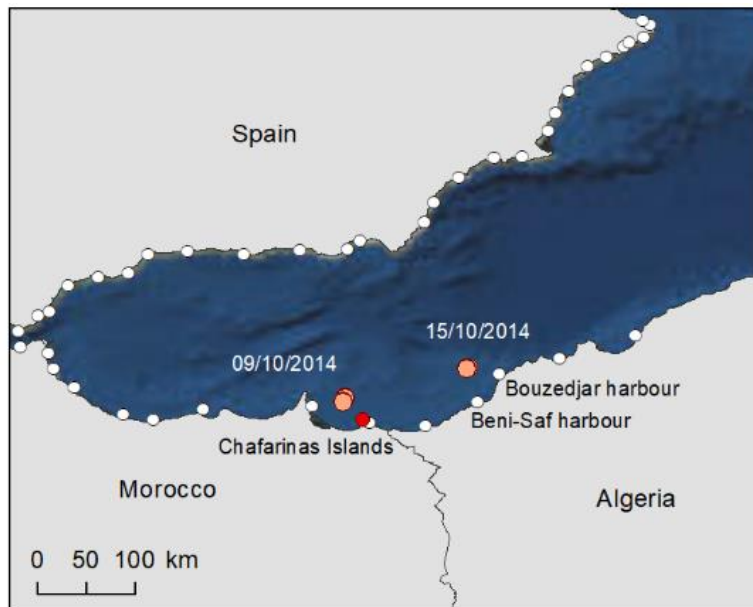

**Figure S1.** Spatial locations retrieved from one of the Scopoli's shearwater juveniles tracked. This individual emitted information during two different days, with a silent lapsus of five days among with. Between the first and second days of transmission, individual travelled 150 km east, towards a coastal zone in the vicinity of two main Algerian fishery harbors. Chafarinas Islands, the breeding colony, is showed by a red dot. White dots indicate main fishing ports.
